# Supplementary material for: Two-stage filamentary mechanism in high-performance organic resistive switches
Source: Royal Society of Chemistry journal article supplement (doi:10.1039/d3tc02348f), 2023-01-01
Supplement: d3tc02348f1.pdf [file d3tc02348f1.pdf]

## Supporting Information

# Two-Stage Filamentary Mechanism in High-Performance Organic Resistive Switch

Arti Bisht<sup>1,2</sup>, Nitish Saini<sup>1,2</sup>, Komal Bhardwaj<sup>1,2</sup>, Rachana Kumar<sup>1,2,3</sup>, Ajeet Kumar<sup>1,2\*</sup>

<sup>1</sup>CSIR-National Physical Laboratory, Dr. K. S. Krishnan Marg, New Delhi 110012, India

<sup>2</sup>Academy of Scientific and Innovative Research (AcSIR), Ghaziabad-201002, India

<sup>3</sup>CSIR-Indian Institute of Toxicology Research, Lucknow 226001, India

\*Corresponding Author Email: [kumarajeet@nplindia.org](mailto:kumarajeet@nplindia.org)

**Table S1.** A summary of resistive switching characteristics of organic-ReRAM devices and governing switching mechanisms.

| Device | Retention | Endurance | On/OFF | Voltage | Memory | Mechanis | Devi | Ref |
|--------|-----------|-----------|--------|---------|--------|----------|------|-----|
|--------|-----------|-----------|--------|---------|--------|----------|------|-----|

| structure                                            | [s]             | [Cycle]         |                 | range [V]    | behavior       | mechanism                                                                       | cell measurement |    |
|------------------------------------------------------|-----------------|-----------------|-----------------|--------------|----------------|---------------------------------------------------------------------------------|------------------|----|
| Al/4C <sub>2</sub> I<br>PN-<br>P <sub>3</sub> HT/ITO | 10 <sup>4</sup> | 150             | 10 <sup>5</sup> | -6/3.3       | Non-Volatile   | Trapping and de-trapping of charges                                             | -                | 1  |
| Ag/Pectin/FTO                                        | 10 <sup>8</sup> | 27              | 10 <sup>4</sup> | 3/-2.8       | Non-Volatile   | Filamentary switching                                                           | -                | 2  |
| Al/D-A-A/ITO                                         | 10 <sup>4</sup> | 60              | 10 <sup>4</sup> | -3.5/1.8     | Non-Volatile   | Trap-based hole transfer                                                        | -                | 3  |
| Al/F8BT/ITO                                          | - a)            | -               | 10              | -5/+5        | Non-Volatile   | The transition of trap-limited SCLC to trap-filled SCLC                         | -                | 4  |
| Al/Carbazole/ITO                                     | 10 <sup>3</sup> | -               | 10 <sup>3</sup> | -1.5/+4      | Non-Volatile   | Formation and dissociation of a charge-transfer state under the applied voltage | -                | 5  |
| Mg/Pectin/Mg                                         | 10 <sup>6</sup> | 160             | 20              | Current bias | Nonvolatile    | Filamentary switching                                                           | -                | 6  |
| Au/PE DOT:<br>PSS/Ag clusters<br>/PMMA<br>/ITO       | 10 <sup>4</sup> | 50              | 10 <sup>2</sup> | -10/+10      | Nonvolatile    | Filamentary switching                                                           | 10               | 7  |
| Ag/2D Imine/ITO                                      | 10 <sup>3</sup> | 200             | 10 <sup>3</sup> | -3/+1        | Flash          | Filamentary switching                                                           | -                | 8  |
| Au/MQDs-PVP/ITO                                      | 10 <sup>3</sup> | -               | 10 <sup>2</sup> | -3.8/-2.2    | Flash and WORM | Trapping and De-trapping of charge carriers                                     | 20               | 9  |
| Al/PVK/ITO                                           | 10 <sup>4</sup> | 15              | 10 <sup>3</sup> | -2.7/+1.4    | Flash          | Filamentary switching                                                           | -                | 10 |
| Cu/Par                                               | 10 <sup>4</sup> | 10 <sup>3</sup> | 10 <sup>3</sup> | -6/+1        | Flash          | Copper                                                                          | 8                | 11 |

|                           |                       |                |                       |                |                          |                                                         |           |                                |
|---------------------------|-----------------------|----------------|-----------------------|----------------|--------------------------|---------------------------------------------------------|-----------|--------------------------------|
| ylene/I<br>TO             |                       |                |                       |                |                          | filament<br>formation                                   |           |                                |
| Al/ PDA<br>coated<br>yarn | 10 <sup>6</sup>       | -              | 10 <sup>3</sup>       | -1.5/+1.5      | Nonvolati<br>le          | carbon-<br>based<br>electric<br>filament                | 25        | <sup>12</sup>                  |
| Ag/PVCI<br>/Au            | 5000                  | 300            | -                     | -1.8/+1.8      | Nonvolati<br>le          | Conductiv<br>e filament                                 | 10        | <sup>13</sup>                  |
| <b>Al/PDI/I<br/>TO</b>    | <b>10<sup>5</sup></b> | <b>&gt;250</b> | <b>10<sup>3</sup></b> | <b>-1.5/+2</b> | <b>Non-<br/>Volatile</b> | <b>Al and<br/>oxygen<br/>vacancy<br/>filament<br/>s</b> | <b>10</b> | <b>Thi<br/>s<br/>wo<br/>rk</b> |

a) No data in this publication.

+

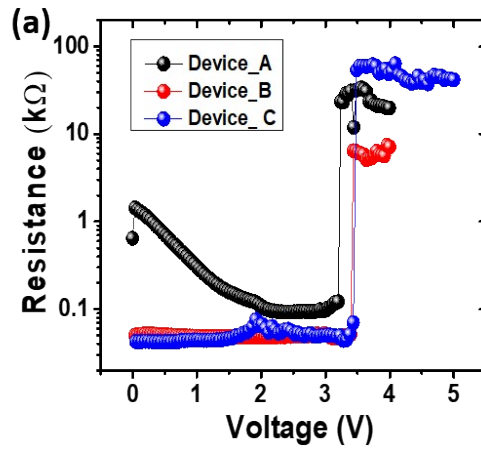

**Figure S1.** Reproducible electroformation of three devices.

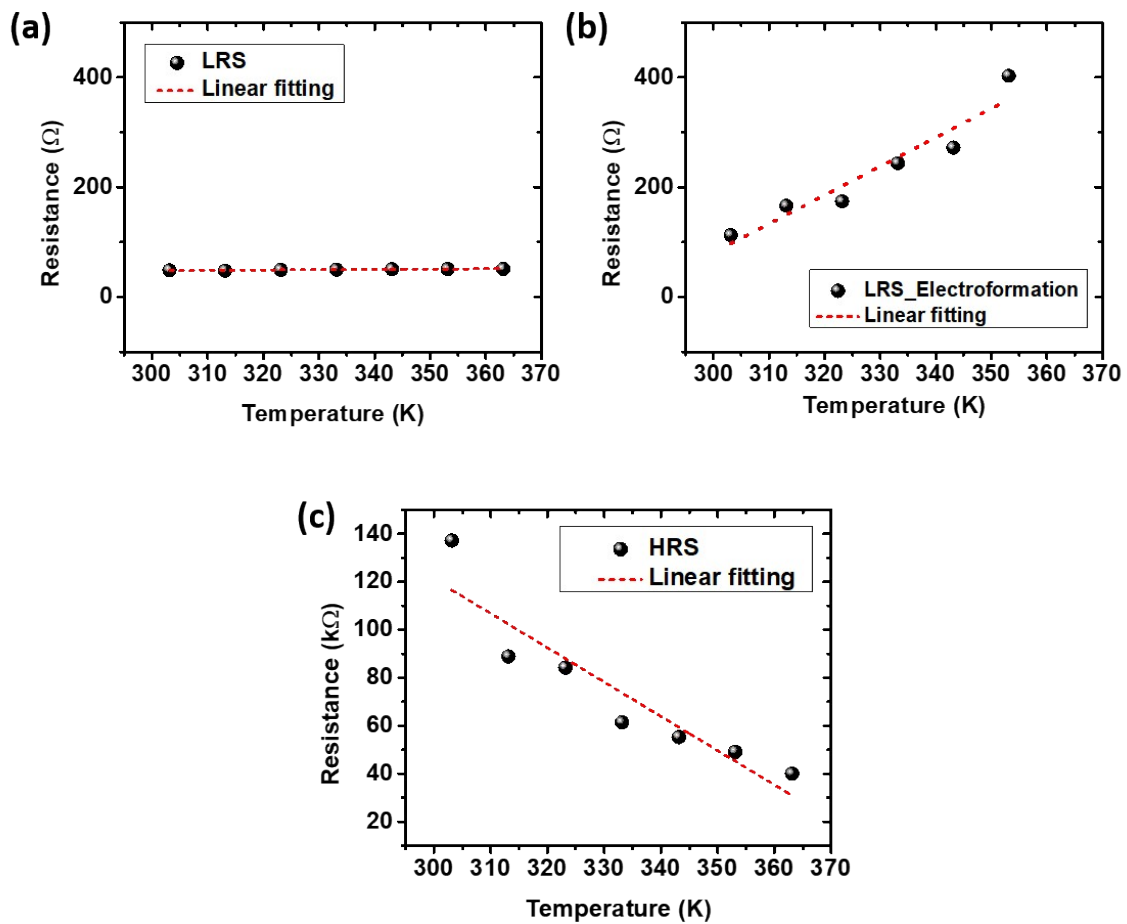

**Figure S2.** Temperature dependence of the resistance states of the device: (a) LRS, (b) LRS just after electroformation, (c) HRS.

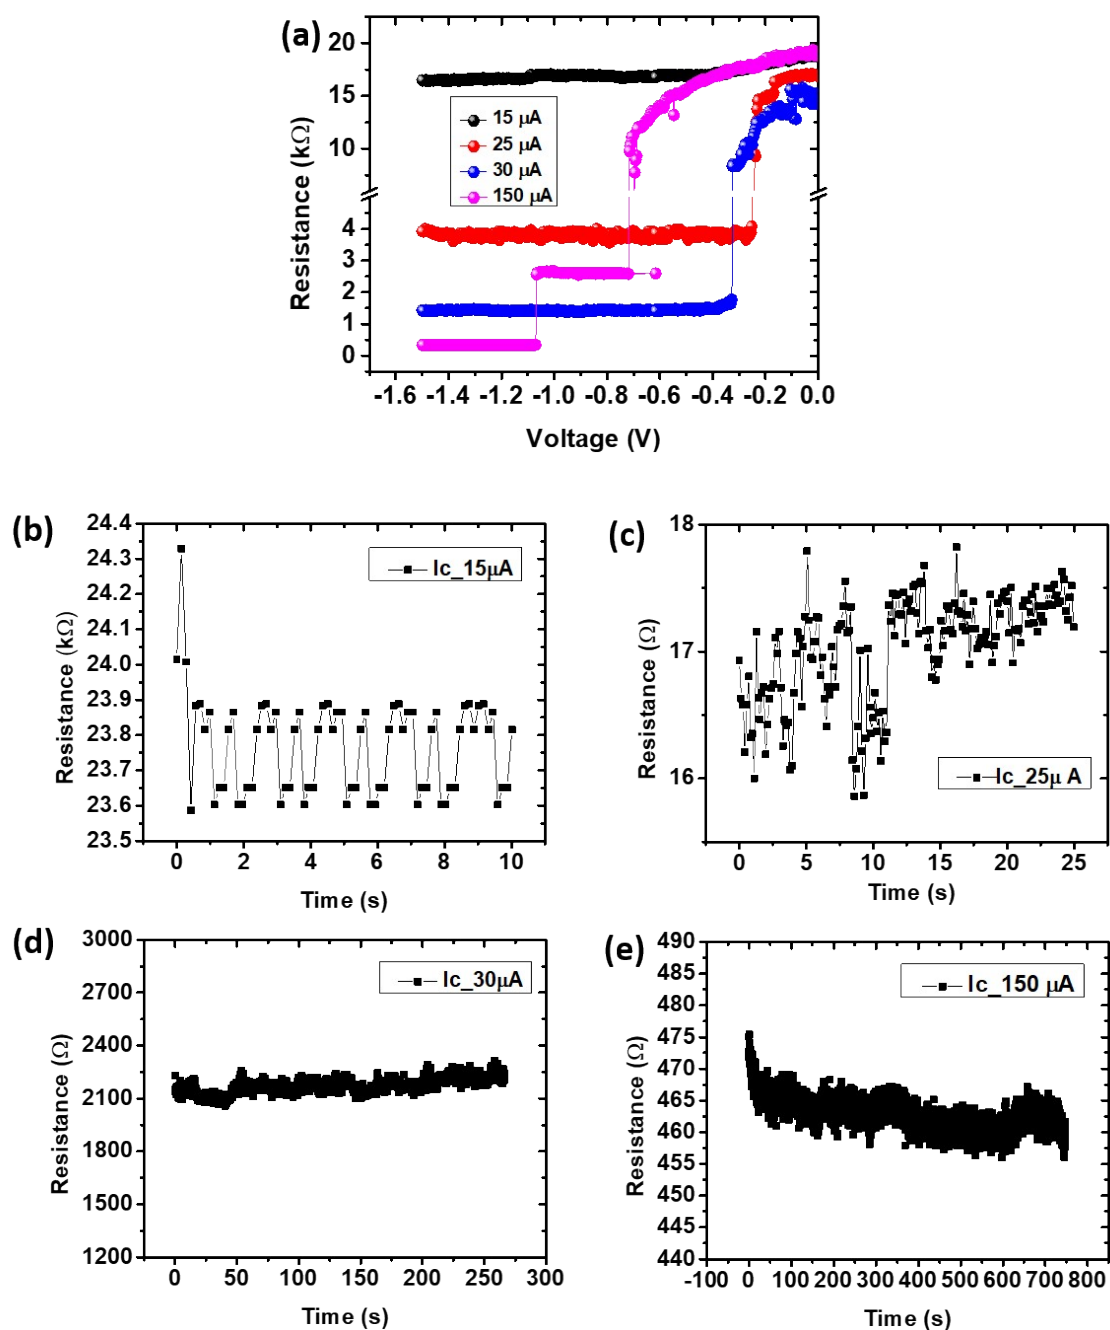

**Figure S3.** (a) Compliance current ( $I_{CC}$ ) dependent switching and stability of the filament of the AI/PVK/ITO device. state of the resistance after switching at (b) 15  $\mu A$   $I_{CC}$ , (c) 25  $\mu A$   $I_{CC}$ , (d) 30  $\mu A$   $I_{CC}$ , (e) 150  $\mu A$   $I_{CC}$ ,

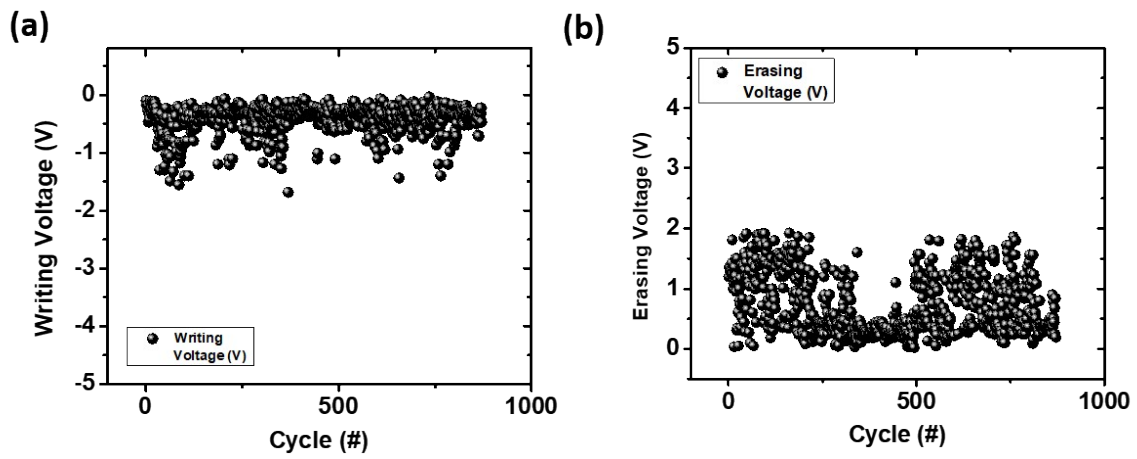

**Figure S4.** (a), (b) switching voltage distribution for cumulative ~880 cycles measured from

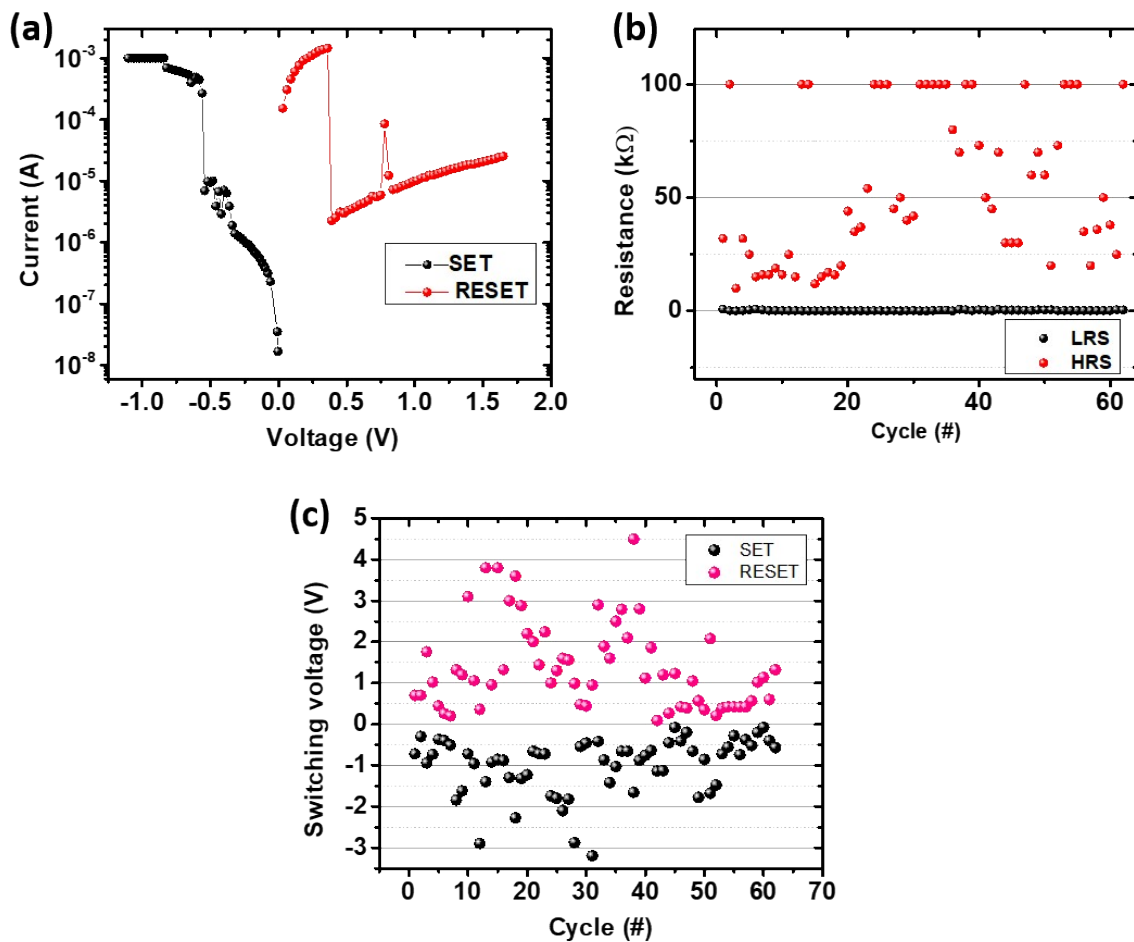

10 different devices.

**Figure S5.** (a) I-V characteristic of the voltages measured after ~2years (b) Endurance of the device after ~2 years. (c) Switching voltage distribution of the device.

## References:

- 1 and B. W. Wei Li, Huiwen Zhu, Tong Sun, Wenshan Qu, Xiaxia Fan, Zhixiang Gao\*, Wei Shi\*, *J. Phys. Chem. C*, 2022, **126**, 12897–12905.
- 2 N. Arshad, M. S. Irshad, M. S. Abbasi, S. Ur Rehman, I. Ahmed, M. Q. Javed, S. Ahmad, M. Sharaf and M. D. Al Firdausi, *RSC Advances*, 2021, **11**, 4327–4338.
- 3 S. Pan, Z. Zhu, H. Yu, W. Lan, B. Wei and K. Guo, *Journal of Materials Chemistry C*, 2021, **9**, 5643–5651.
- 4 M. N. Awais, M. Mustafa, M. N. Shehzad, U. Farooq, M. T. Hamayun and K. H. Choi, *Micro and Nano Letters*, 2016, **11**, 712–714.
- 5 W. Lin, H. Sun, S. Liu, H. Yang, S. Ye, W. Xu, Q. Zhao, X. Liu and W. Huang, *Macromolecular Chemistry and Physics*, 2012, **213**, 2472–2478.
- 6 and Y. L. Xiaoning Zhao, Jiaqi Xu, Dan Xie, Zhongqiang Wang, Haiyang Xu,\* Ya Lin, Junli Hu, 2021, 2104023.
- 7 H. L. Park, M. H. Kim and S. H. Lee, *Advanced Electronic Materials*, 2020, **6**, 1–8.
- 8 J. Liu, F. Yang, L. Cao, B. Li, K. Yuan, S. Lei and W. Hu, 2019, **1902264**, 1–7.
- 9 H. Mao, C. Gu, S. Yan, Q. Xin, S. Cheng, P. Tan and X. Wang, 2019, **1900493**, 1–8.
- 10 H. F. Ling, M. D. Yi, M. Nagai, L. H. Xie, L. Y. Wang, B. Hu and W. Huang, *Advanced Materials*, 2017, **29**, 1–9.
- 11 A. A. Minnekhanov, B. S. Shvetsov, M. M. Martyshov, K. E. Nikiruy, E. V Kukueva, M. Yu, P. A. Forsh, V. V Rylkov, V. V Erokhin, V. A. Demin and A. V Emelyanov, *Organic Electronics*, 2019, **74**, 89–95.
- 12 S.-B. J. Hagyoul Bae, Daewon Kim, Myungsoo Seo, Ik Kyeong Jin, K. Y. Hye Moon Lee, Soo-Ho Jung, Byung Chul Jang, Gyeongho Son and and Y.-K. C. Sung-Yool Choi, 2019, 1900151.
- 13 H. L. Park, M. H. Kim, M. H. Kim and S. H. Lee, *Nanoscale*, 2020, **12**, 22502–22510.
